# Supplementary material for: Coordination-induced and tunable layered rare-earth hydroxide-complex intercalated nanohybrid phosphorescent photosensitizer and therapy
Source: Royal Society of Chemistry journal article supplement (doi:10.1039/d3ra07310f), 2024-01-01
Supplement: d3ra07310f1.pdf [file d3ra07310f1.pdf]

**Electronic Supporting Information (ESI)**

*for*

**Coordination-induced and tunable layered rare-earth  
hydroxides-complex intercalated nanohybrids  
phosphorescent photosensitizer and therapy**

Zhongli Zhao,<sup>\*a,b</sup> Hailong Lin,<sup>b</sup> Tianshu Yang,<sup>a</sup> Lulu Zhang,<sup>a</sup> Qingyi Liu,<sup>b</sup> Chun zhang<sup>\*a</sup>  
Fengyu Qian<sup>a</sup>

<sup>a</sup> College of Chemistry and Chemical Engineering, Lanzhou Jiaotong University, Lanzhou 730070, P. R. China.

<sup>b</sup> Key Laboratory of Nonferrous Metal Chemistry and Resources Utilization of Gansu Province, College of Chemistry and Chemical Engineering, Lanzhou University, Lanzhou 730000, P. R. China.

E-mail: [zhaozl\\_521@163.com](mailto:zhaozl_521@163.com), [zh-chun@163.com](mailto:zh-chun@163.com). Fax: +86 931-493-8755.

## Contents

### 1. Figures and tables

|                                                                                                                                                                                                                                                                          |     |
|--------------------------------------------------------------------------------------------------------------------------------------------------------------------------------------------------------------------------------------------------------------------------|-----|
| <b>Fig. S1</b> (a) and (b) SEM images, (c) TEM images and (d) PXRD patterns of LGdH-----                                                                                                                                                                                 | S-3 |
| <b>Fig. S2</b> (a) and (b) SEM images, (c) PXRD patterns ( $2\theta = 5-60^\circ$ ) of LEuH-----                                                                                                                                                                         | S-3 |
| <b>Fig. S3</b> FTIR spectra of (a) LGdH, (b) 5,5'BDA, (c) LGdH-5,5'BDA, (d) HPhN (L), (e) GdL <sub>3</sub> and (f) LGdH-5,5'BDA-GdL <sub>3</sub> -----                                                                                                                   | S-4 |
| <b>Fig. S4</b> FTIR spectra of (a) LGdH, (b') 4,4'BDA, (c') LGdH-4,4'BDA, (d) HPhN (L), (e) GdL <sub>3</sub> and (f') LGdH-4,4'BDA-GdL <sub>3</sub> -----                                                                                                                | S-4 |
| <b>Fig. S5</b> UV-Vis absorption spectra of GdL <sub>3</sub> , LGdH-4,4'BDA, LGdH-5,5'BDA, LGdH-4,4'BDA-GdL <sub>3</sub> and LGdH-5,5'BDA-GdL <sub>3</sub> samples in ethanol -----                                                                                      | S-5 |
| <b>Fig. S6</b> The low temperature phosphorescence spectra of HPhN and Gd(HPhN) <sub>3</sub> -----                                                                                                                                                                       | S-5 |
| <b>Fig. S7</b> The luminescence decays of LGdH-5,5'BDA-GdL <sub>3</sub> and LGdH-4,4'BDA-GdL <sub>3</sub> solid samples----                                                                                                                                              | S-6 |
| <b>Fig. S8</b> UV-Vis absorption spectra of BDA-----                                                                                                                                                                                                                     | S-6 |
| <b>Fig. S9</b> The phosphorescence spectra of various hybrids in water, (a) LGdH-5,5'BDA-GdL <sub>3</sub> , (b) LGdH-4,4'BDA-GdL <sub>3</sub> -----                                                                                                                      | S-7 |
| <b>Fig. S10</b> The phosphorescence performance of LGdH-5,5'BDA-GdL <sub>3</sub> suspension at room temperature, (a) luminescence intensity, (b) decay lifetime, inner: the linear relationship between $I_0/I$ and $\tau_0/\tau$ with O <sub>2</sub> concentration----- | S-7 |
| <b>Fig. S11</b> UV-Vis absorption spectra of DPBF with different irradiation time (a) Blank; (b) LGdH-5,5'BDA-GdL <sub>3</sub> ; (c) LGdH-4,4'BDA-GdL <sub>3</sub> -----                                                                                                 | S-8 |
| <b>Fig. S12</b> The fluorescence spectra of DCFH at different irradiation time (a) Blank; (b) LGdH-5,5'BDA-GdL <sub>3</sub> ; (c) LGdH-4,4'BDA-GdL <sub>3</sub> -----                                                                                                    | --- |
| -----                                                                                                                                                                                                                                                                    | S-8 |
| <b>Table S1</b> The factor and level design of orthogonal test of LGdH-----                                                                                                                                                                                              | S-  |
| 9                                                                                                                                                                                                                                                                        |     |
| <b>Table S2</b> The level of (002) diffraction peak and calculated basal spacing -----                                                                                                                                                                                   | S-  |
| 9                                                                                                                                                                                                                                                                        |     |
| <b>Table S3</b> N <sub>2</sub> adsorption-desorption isotherm studies of solid hybrids-----                                                                                                                                                                              | S-9 |

1. Figures and tables

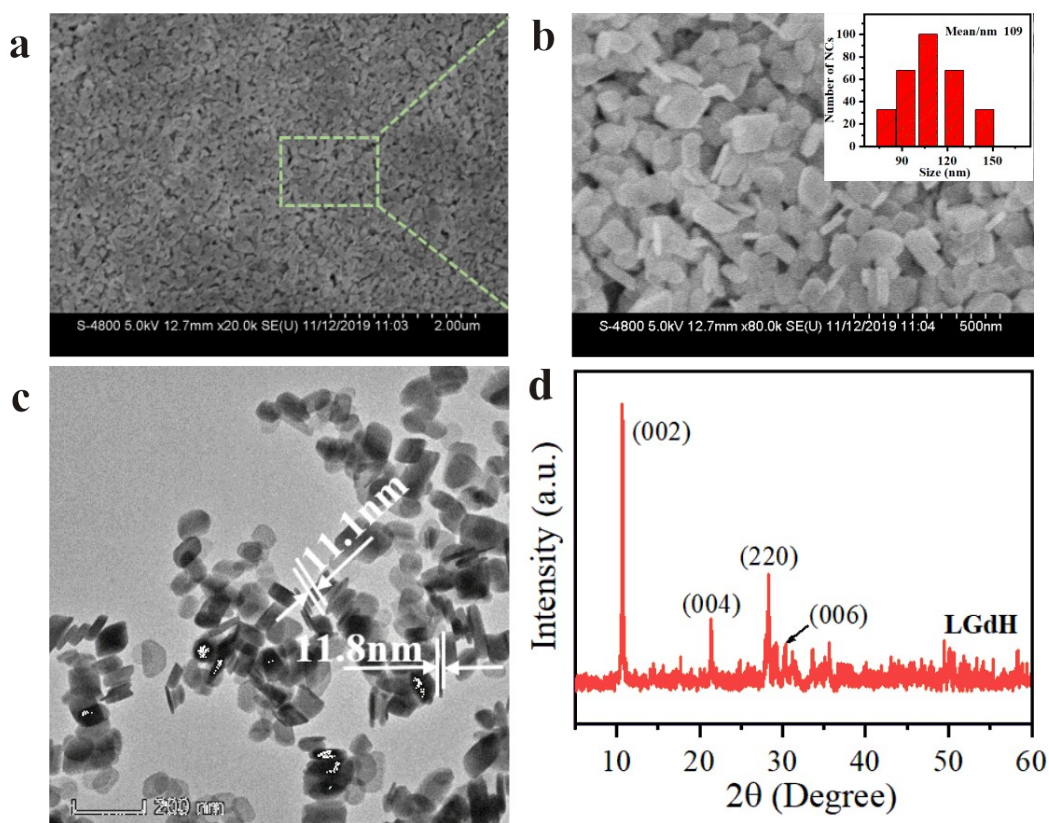

**Fig. S1** (a) and (b) SEM images, (c) TEM images, (d) PXRD patterns ( $2\theta = 5-60^\circ$ ) of LGdH.

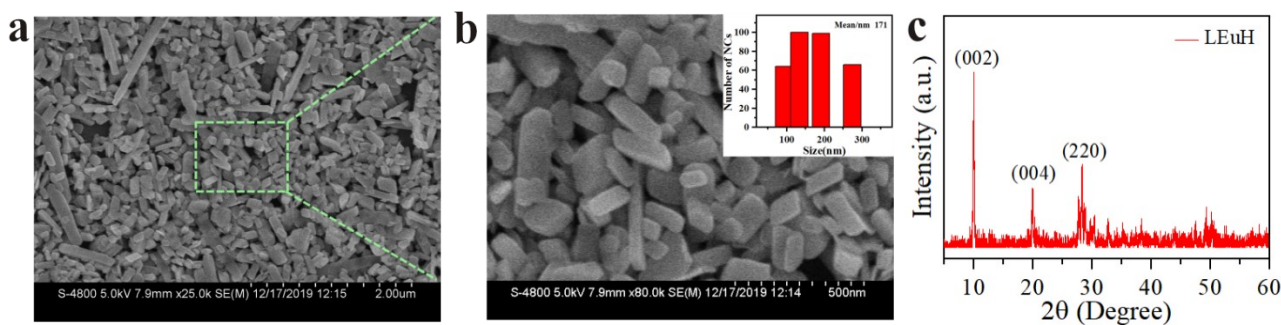

**Fig. S2** (a) and (b) SEM images, (c) PXRD patterns ( $2\theta = 5-60^\circ$ ) of LLeuH.

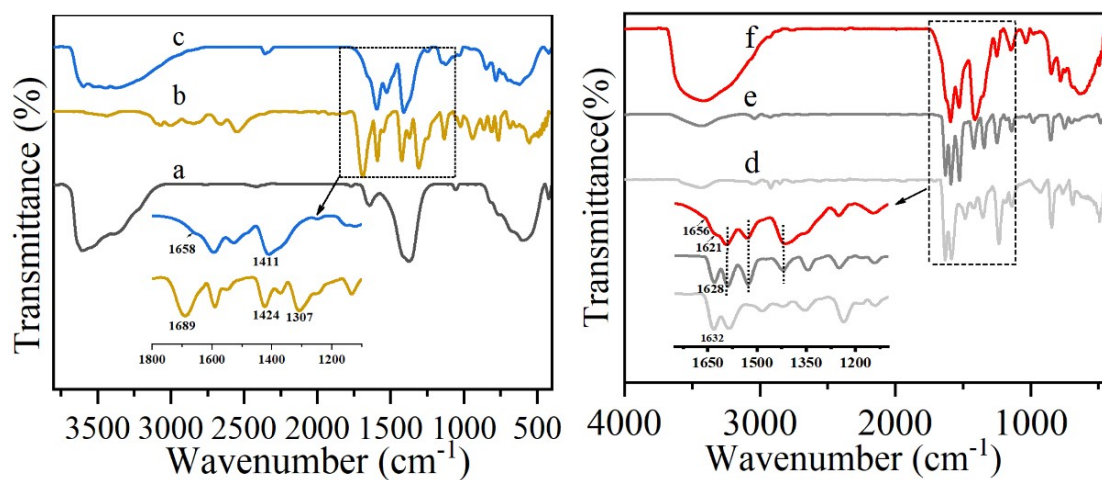

**Fig. S3** FTIR spectra of (a) LGdH, (b) 5,5'-BDA, (c) LGdH-5,5'-BDA, (d) HPhN (L), (e)  $\text{GdL}_3$  and (f) LGdH-5,5'-BDA- $\text{GdL}_3$

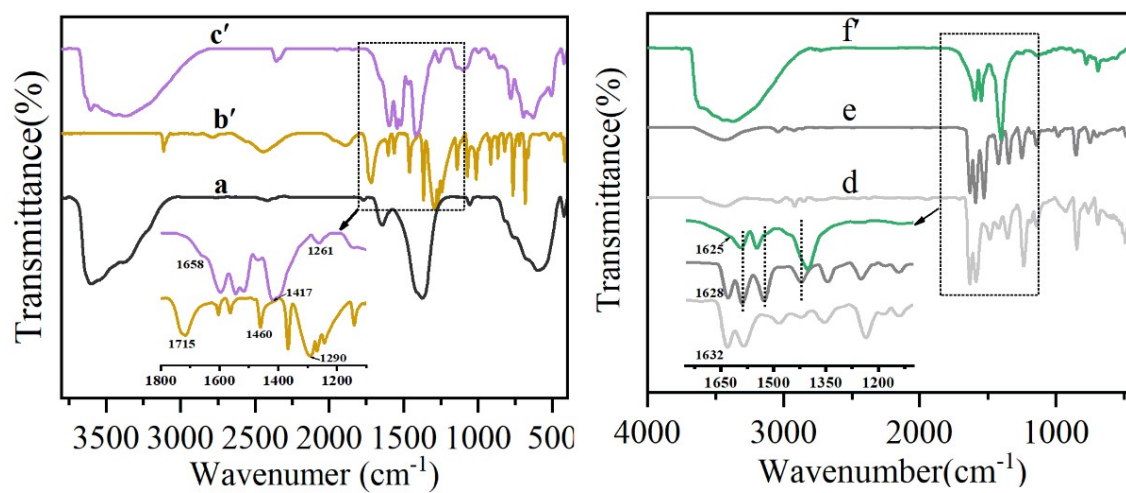

**Fig. S4** FTIR spectra of (a) LGdH, (b') 4,4'-BDA, (c') LGdH-4,4'-BDA, (d) HPhN (L), (e)  $\text{GdL}_3$  and (f') LGdH-4,4'-BDA- $\text{GdL}_3$

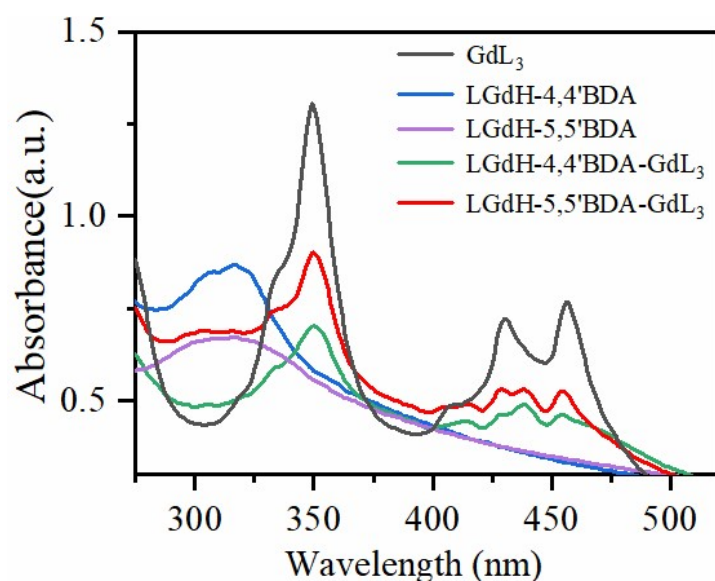

**Fig. S5** UV-Vis absorption spectra of GdL<sub>3</sub> ( $1.0 \times 10^{-5}$  mol/L), LGdH-4,4'BDA (0.5 mg/mL), LGdH-5,5'BDA (0.5 mg/mL), LGdH-4,4'BDA-GdL<sub>3</sub> (0.5 mg/mL) and LGdH-5,5'BDA-GdL<sub>3</sub> (0.5 mg/mL) samples in ethanol.

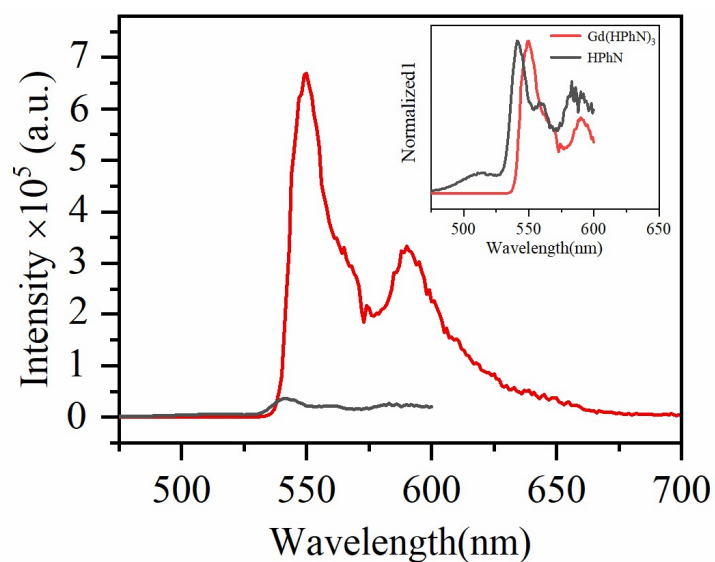

**Fig. S6** The low temperature (77K) phosphorescence spectra of HPhN and Gd(HPhN)<sub>3</sub><sup>S1</sup>

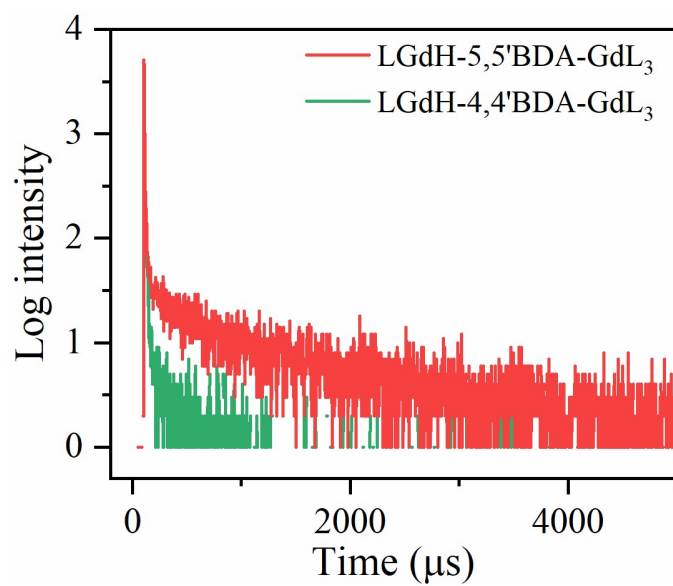

**Fig. S7** The luminescence decays of LGdH-5,5'BDA-GdL<sub>3</sub> and LGdH-4,4'BDA-GdL<sub>3</sub> solid samples.

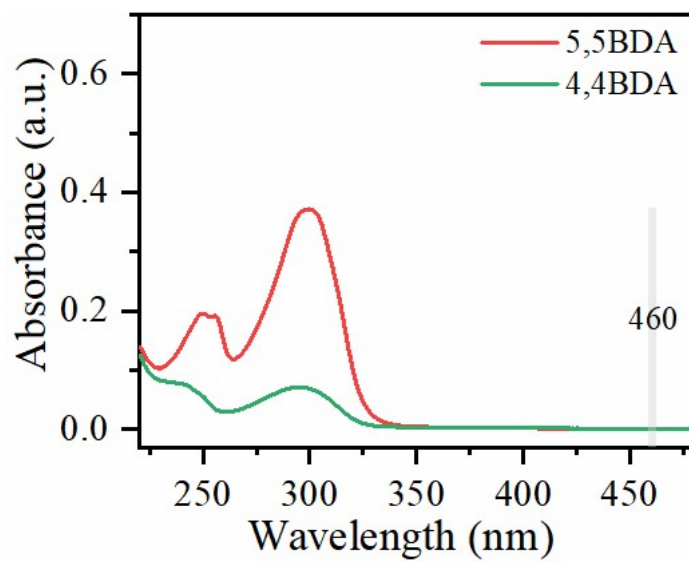

**Fig. S8** UV-Vis absorption spectra of BDA

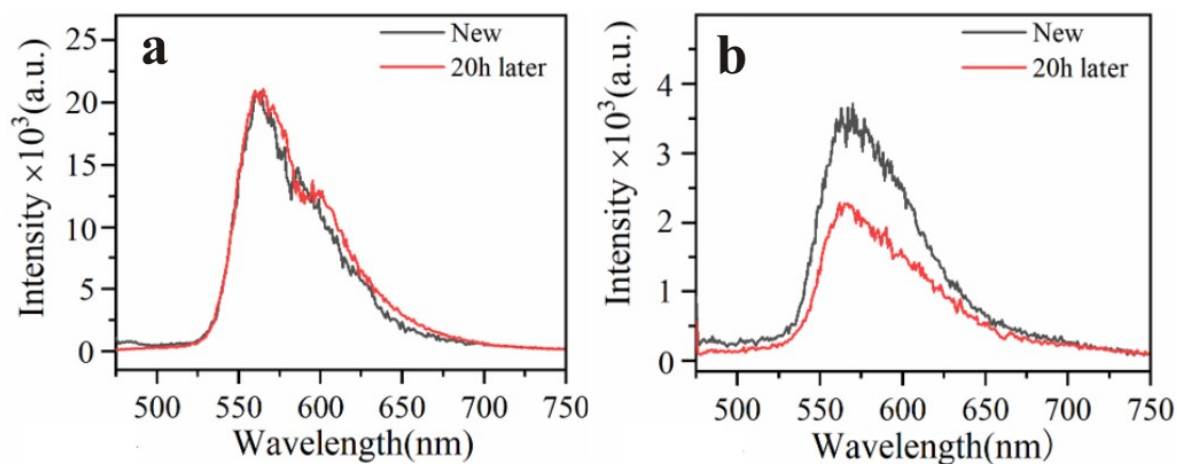

**Fig. S9** The phosphorescence spectra of various hybrids in water, (a) LGdH-5,5'BDA-GdL<sub>3</sub>; (b) LGdH-4,4'BDA-GdL

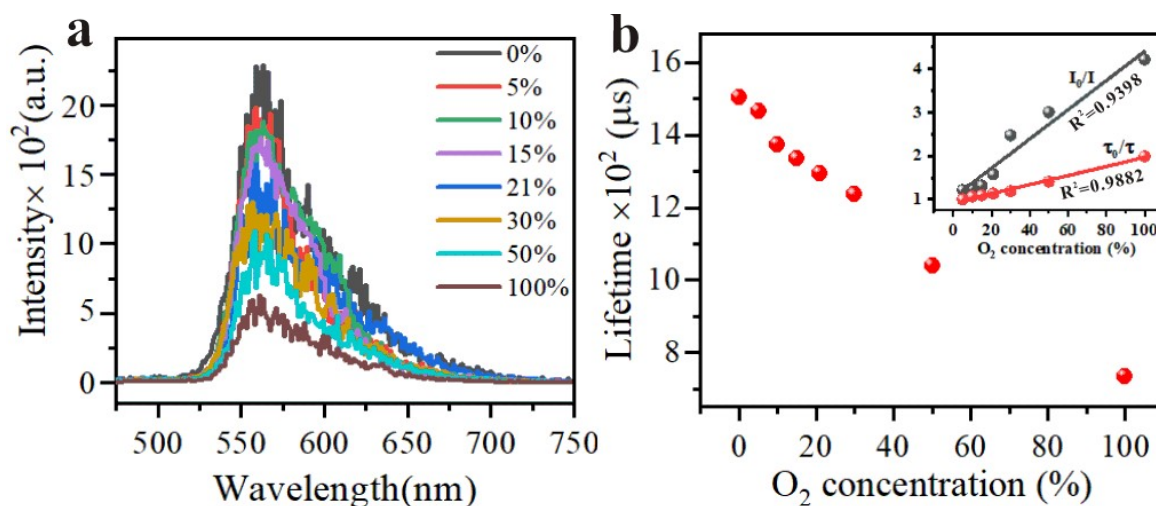

**Fig. S10** The phosphorescence performance of LGdH-5,5'BDA-GdL<sub>3</sub> suspension (0.5g/mL, λ<sub>ex</sub> = 460 nm) at room temperature, (a) luminescence intensity, (b) decay lifetime, inner: the linear relationship between I<sub>0</sub>/I and τ<sub>0</sub>/τ with O<sub>2</sub> concentration<sup>S2</sup>.

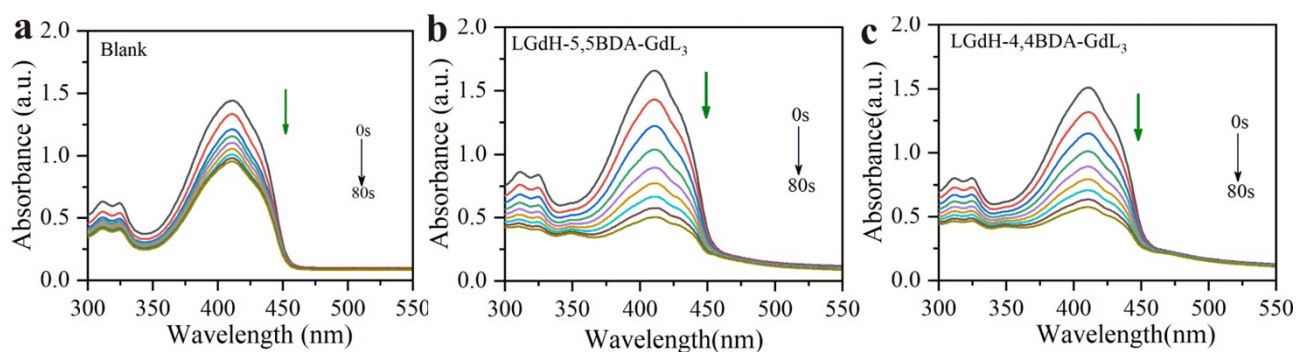

**Fig. S11** UV-Vis absorption spectra of DPBF with different irradiation time (460nm LED lamp, irradiation time: 10 s every time), (a) Blank; (b) LGdH-5,5'BDA-GdL<sub>3</sub>; (c) LGdH-4,4'BDA-GdL<sub>3</sub>;

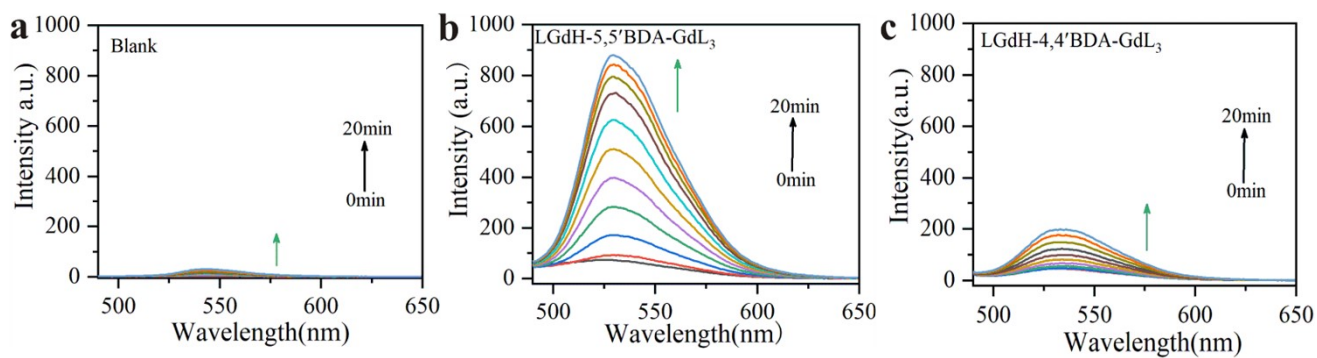

**Fig. S12** The fluorescence spectra of DCFH at different irradiation time (460nm LED lamp, irradiation time: 2min every time), (a) Blank; (b) LGdH-5,5'BDA-GdL<sub>3</sub>; (c) LGdH-4,4'BDA-GdL<sub>3</sub>;



Table S1 The factor and level design of orthogonal test of LGdH

|   | Concentration of Gd <sup>3+</sup> ion (c) / mol·L <sup>-1</sup> | Stirring time (t <sub>1</sub> ) /min | Hydrothermal temperature (T) / °C | Hydrothermal time (t <sub>2</sub> ) / h |
|---|-----------------------------------------------------------------|--------------------------------------|-----------------------------------|-----------------------------------------|
| 1 | 0.01                                                            | 5                                    | 90                                | 24                                      |
| 2 | 0.01                                                            | 15                                   | 120                               | 36                                      |
| 3 | 0.01                                                            | 25                                   | 150                               | 48                                      |
| 4 | 0.03                                                            | 5                                    | 120                               | 48                                      |
| 5 | 0.03                                                            | 15                                   | 150                               | 24                                      |
| 6 | 0.03                                                            | 25                                   | 90                                | 36                                      |
| 7 | 0.05                                                            | 5                                    | 150                               | 36                                      |
| 8 | 0.05                                                            | 15                                   | 90                                | 48                                      |
| 9 | 0.05                                                            | 25                                   | 120                               | 24                                      |

Table S2 The level of (002) diffraction peak and calculated basal spacing

|                  | LGdH  | LGdH-5,5'BDA | LGdH-4,4'BDA | LGdH-5,5'BDA-GdL <sub>3</sub> | LGdH-4,4'BDA-GdL <sub>3</sub> |
|------------------|-------|--------------|--------------|-------------------------------|-------------------------------|
| 2θ /Degree       | 10.82 | 5.48         | 5.96         | 5.60                          | 5.94                          |
| Basal spacing/nm | 0.83  | 1.64         | 1.50         | 1.58                          | 1.50                          |

Table S3 N<sub>2</sub> adsorption–desorption isotherm studies of solid hybrids

|                                                     | LGdH-5,5'BDA | LGdH-4,4'BDA | LGdH-5,5'BDA-GdL <sub>3</sub> | LGdH-4,4'BDA-GdL <sub>3</sub> |
|-----------------------------------------------------|--------------|--------------|-------------------------------|-------------------------------|
| BET Surface Area (m <sup>2</sup> ·g <sup>-1</sup> ) | 26.2         | 19.0         | 10.1                          | 23.0                          |

## 2. Notes and references

(S1) Z. L. Zhao, J. X. Ru, P. P. Zhou, Y. S. Wang, C. F. Shan, X. X. Yang, J. Cao, W. S. Liu, H. C. Guo and Y. Tang, *Dalton Trans.*, 2019, **48**, 16952-16960.

(S2) M. Fernandes, Z. Bermudez, V. S. Ferreira, R. A. Carlos, L. D. Charas, A. Morgado, J. Silva and M. M. Smith, *Chem. Mater.*, 2007, **19**, 3892-3901.
